# Supplementary material
Source: PubMed Central journal article supplement (PMC2818468)

Supplemental figure 1

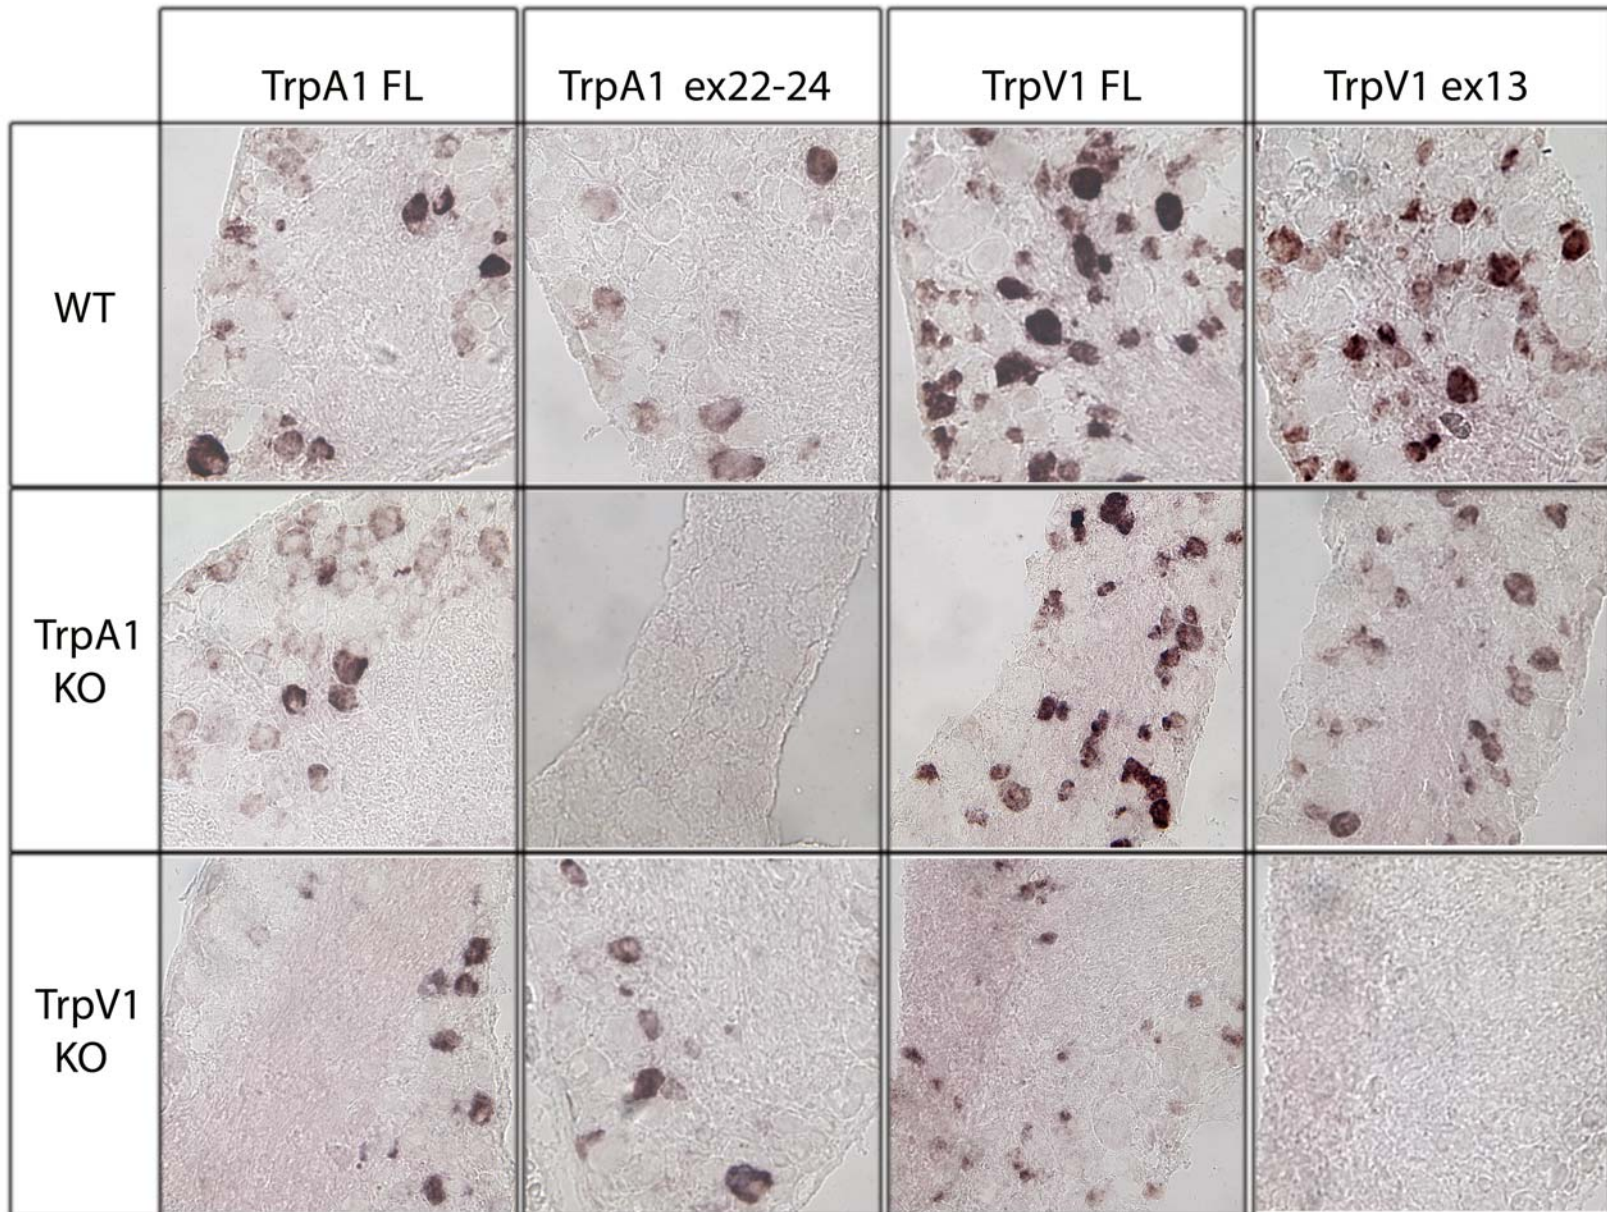

Supplement: NIHMS158787-supplement-01.pdf [file NIHMS158787-supplement-01.pdf]

## Supplementary figure 2

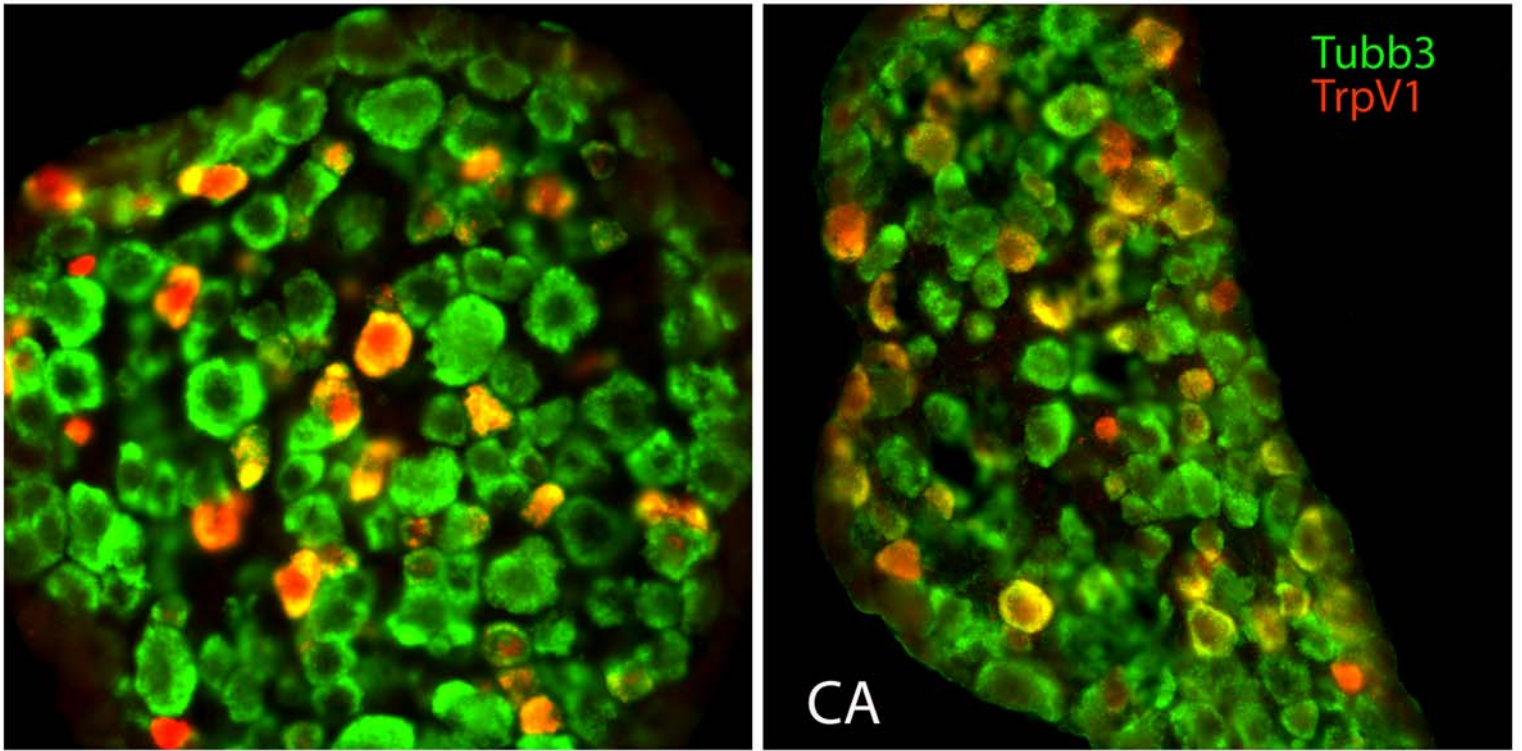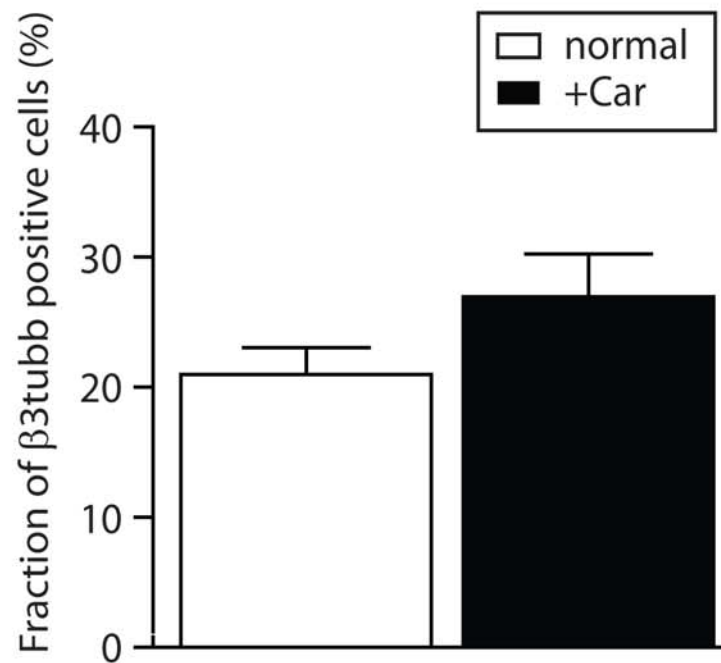

Supplement: NIHMS158787-supplement-02.pdf [file NIHMS158787-supplement-02.pdf]
